# Supplementary material for: Small organ size contributes to the slow pace of life in tropical birds
Source: Oxford University Press journal article supplement (doi:10.1242/jeb.065144), 2012-04-25
Supplement: jeb065144tables1.pdf [file jeb065144tables1.pdf]

| Family       | Species                           | Name                       | Climate   | Literature source for data on |     |      |     |      |     |     |     |     |     |   |
|--------------|-----------------------------------|----------------------------|-----------|-------------------------------|-----|------|-----|------|-----|-----|-----|-----|-----|---|
|              |                                   |                            |           | Hea                           | Lun | FIMu | Giz | GiIn | Liv | Kid | Pan | Spl | Bra |   |
|              | <i>Laniocera rufescens</i>        | Speckled Mourner           | tropical  | H1                            |     |      |     |      |     |     |     |     |     |   |
|              | <i>Legatus leucophaeus</i>        | Piratic Flycatcher         | tropical  | H2                            |     | H2   |     |      |     |     |     |     |     |   |
|              | <i>Leptopogon superciliaris</i>   | Slaty-Capped Flycatcher    | tropical  | H2                            |     | H2   |     |      |     |     |     |     |     |   |
|              | <i>Lipaugus unirufus</i>          | Rufous Piha                | tropical  | H2                            |     | H2   |     |      |     |     |     |     |     |   |
|              | <i>Lophotriccus pileatus</i>      | Scale-Crested Pygmy-Tyrant | tropical  | H2                            |     | H2   |     |      |     |     |     |     |     |   |
|              | <i>Manacus vitellinus</i>         | Golden-Collared Manakin    | tropical  | H2                            |     | H2   |     |      |     |     |     |     |     |   |
|              | <i>Megarynchus pitangua</i>       | Boat-Billed Flycatcher     | tropical  | H2                            |     | H2   |     |      |     |     |     |     |     |   |
|              | <i>Mionectes olivaceus</i>        | Olive-Striped Flycatcher   | tropical  | H2                            |     | H2   |     |      |     |     |     |     |     |   |
|              | <i>Mitrephanes phaeocercus</i>    | Tufted Flycatcher          | tropical  | H2                            |     | H2   |     |      |     |     |     |     |     |   |
|              | <i>Myiarchus ferox</i>            | Short-Crested Flycatcher   | tropical  | H2                            |     | H2   |     |      |     |     |     |     |     |   |
| (Tyrannidae) | <i>Myiarchus tuberculifer</i>     | Dusky-Capped Flycatcher    | tropical  | H2                            |     | H2   |     |      |     |     |     |     |     |   |
|              | <i>Myiobius atricaudus</i>        | Black-Tailed Flycatcher    | tropical  | H2                            |     | H2   |     |      |     |     |     |     |     |   |
|              | <i>Myiobius barbatus</i>          | Sulphur-Rumped Flycatcher  | tropical  | H2                            |     | H2   |     |      |     |     |     |     |     |   |
|              | <i>Myiodynastes hemichrysus</i>   | Golden-Bellied Flycatcher  | tropical  | H2                            |     | H2   |     |      |     |     |     |     |     |   |
|              | <i>Myiodynastes maculatus</i>     | Streaked Flycatcher        | tropical  | H2                            |     | H2   |     |      |     |     |     |     |     |   |
|              | <i>Myiopagis viridicata</i>       | Greenish Elaenia           | tropical  | H2                            |     | H2   |     |      |     |     |     |     |     |   |
|              | <i>Myiophobus fasciatus</i>       | Bran-Colored Flycatcher    | tropical  | H2                            |     | H2   |     |      |     |     |     |     |     |   |
|              | <i>Myiozetetes cayanensis</i>     | Rusty-Margined Flycatcher  | tropical  | H2                            |     | H2   |     |      |     |     |     |     |     |   |
|              | <i>Myiozetetes granadensis</i>    | Grey-Capped Flycatcher     | tropical  | H2                            |     | H2   |     |      |     |     |     |     |     |   |
|              | <i>Myiozetetes similis</i>        | Social Flycatcher          | tropical  | H2                            |     | H2   |     |      |     |     |     |     |     |   |
|              | <i>Oncostoma olivaceum</i>        | Southern Bentbill          | tropical  | H2                            |     | H2   |     |      |     |     |     |     |     |   |
|              | <i>Onychorhynchus coronatus</i>   | Royal Flycatcher           | tropical  | H2                            |     | H2   |     |      |     |     |     |     |     |   |
|              | <i>Pachyrampus cinnamomeus</i>    | Cinnamon Becard            | tropical  | H2                            |     | H2   |     |      |     |     |     |     |     |   |
|              | <i>Pachyrampus polychopterus</i>  | White-Winged Becard        | tropical  | H2                            |     | H2   |     |      |     |     |     |     |     |   |
|              | <i>Pachyrampus versicolor</i>     | Barred Becard              | tropical  | H2                            |     | H2   |     |      |     |     |     |     |     |   |
|              | <i>Pipra mentalis</i>             | Red-Capped Manakin         | tropical  | H2                            |     | H2   |     |      |     |     |     |     |     |   |
|              | <i>Platyrinchus mystaceus</i>     | White-Throated Spadebill   | tropical  | H2                            |     | H2   |     |      |     |     |     |     |     |   |
|              | <i>Poecilotriccus sylvia</i>      | Slate-Headed Tody-Tyrant   | tropical  | H2                            |     | H2   |     |      |     |     |     |     |     |   |
|              | <i>Querula purpurata</i>          | Purple-Throated Fruitcrow  | tropical  | H2                            |     | H2   |     |      |     |     |     |     |     |   |
|              | <i>Rhynchocyclus brevirostris</i> | Eye-Ringed Flatbill        | tropical  | H2                            |     | H2   |     |      |     |     |     |     |     |   |
|              | <i>Rhynchocyclus olivaceus</i>    | Olivaceous Flatbill        | tropical  | H2                            |     | H2   |     |      |     |     |     |     |     |   |
|              | <i>Rhytipterna holerythra</i>     | Rufous Mourner             | tropical  | H2                            |     | H2   |     |      |     |     |     |     |     |   |
|              | <i>Sayornis phoebe</i>            | Eastern Phoebe             | temperate | H1                            |     |      |     |      |     |     |     |     |     |   |
|              | <i>Schiffornis turdina</i>        | Thrush-Like Schiffornis    | tropical  | H2                            |     | H2   |     |      |     |     |     |     |     |   |
|              | <i>Serpophaga cinerea</i>         | Torrent Tyrannulet         | tropical  | H2                            |     | H2   |     |      |     |     |     |     |     |   |
|              | <i>Terentriacus erythurus</i>     | Ruddy-Tailed Flycatcher    | tropical  | H2                            |     | H2   |     |      |     |     |     |     |     |   |
|              | <i>Tityra inquisitor</i>          | Black-Crowned Tityra       | tropical  | H2                            |     | H2   |     |      |     |     |     |     |     |   |
|              | <i>Tityra semifasciata</i>        | Masked Tityra              | tropical  | H2                            |     | H2   |     |      |     |     |     |     |     |   |
|              | <i>Todirostrum cinereum</i>       | Common Tody-Flycatcher     | tropical  | H2                            |     | H2   |     |      |     |     |     |     |     |   |
|              | <i>Tolmomyias sulphurescens</i>   | Yellow-Olive Flycatcher    | tropical  | H2                            |     | H2   |     |      |     |     |     |     |     |   |
|              | <i>Tyranniscus zeledoni</i>       | White-Fronted Tyrannulet   | tropical  | H2                            |     | H2   |     |      |     |     |     |     |     |   |
|              | <i>Tyrannulus elatus</i>          | Yellow-Crowned Tyrannulet  | tropical  | H2                            |     | H2   |     |      |     |     |     |     |     |   |
|              | <i>Tyrannus melancholicus</i>     | Tropical Kingbird          | tropical  | H2                            |     | H2   |     |      |     |     |     |     |     |   |
| (Tyrannidae) | <i>Tyrannus savana</i>            | Fork-Tailed Flycatcher     | tropical  | H2                            |     | H2   |     |      |     |     |     |     |     |   |
|              | <i>Zimmerius vilissimus</i>       | Paltry Tyrannulet          | tropical  | H2                            |     | H2   |     |      |     |     |     |     |     |   |
| Tytonidae    | <i>Tyto alba</i>                  | Barn Owl                   | temperate |                               |     |      |     |      |     |     |     |     |     | G |
| Vireonidae   | <i>Cyclarhis gujanensis</i>       | Rufous-Browed Peppershrike | tropical  | H2                            |     | H2   |     |      |     |     |     |     |     |   |
|              | <i>Hylophilus aurantiifrons</i>   | Golden-Fronted Greenlet    | tropical  | H2                            |     | H2   |     |      |     |     |     |     |     |   |
|              | <i>Hylophilus decurtatus</i>      | Lesser Greenlet            | tropical  | H2                            |     | H2   |     |      |     |     |     |     |     |   |
|              | <i>Hylophilus flavipes</i>        | Scrub Greenlet             | tropical  | H2                            |     | H2   |     |      |     |     |     |     |     |   |
|              | <i>Hylophilus ochraceiceps</i>    | Tawny-Crowned Greenlet     | tropical  | H2                            |     | H2   |     |      |     |     |     |     |     |   |
|              | <i>Vireo carmioli</i>             | Yellow-Winged Vireo        | tropical  | H2                            |     | H2   |     |      |     |     |     |     |     |   |
|              | <i>Vireo leucophrys</i>           | Brown-Capped Vireo         | tropical  | H2                            |     | H2   |     |      |     |     |     |     |     |   |
|              | <i>Vireo solitarius</i>           | Blue-Headed Vireo          | temperate | H1                            |     |      |     |      |     |     |     |     |     |   |

Species are ordered alphabetically on family and species name. Literature sources are abbreviated as follows: C: (Crile and Quiring, 1940), G:

(Garamszegi et al., 2002), GG: (Graber and Graber, 1965), H1: (Hartman, 1955), H2: (Hartman, 1961), O: (Oakeson, 1956), R: (Rensch and Rensch,

1956). References are presented below. Organs names are indicated by Hea: heart, Lun: lungs, FIMu: flight muscles, Giz: gizzard, Giln: gizzard+intestines, Liv: liver, Kid: kidneys, Pan: pancreas, Spl: spleen, Bra: brain.

#### REFERENCES

- Crile, G. and Quiring, D. P.** (1940) A record of the body weight and certain organ and gland weights of 3690 animals. *Ohio J. Sci.* **40**, 219-259.
- Garamszegi, L. Z., Møller, A. P. and Erritzøe, J.** (2002) Coevolving avian eye size and brain size in relation to prey capture and nocturnality. *Proc. R. Soc. B* **269**, 961-967.
- Graber, R. R. and Graber, J. W.** (1965) Variation in avian brain weights with special reference to age. *Condor* **67**, 300-318.
- Hartman, F. A.** (1955) Heart weight in birds. *Condor* **57**, 221-238.
- Hartman, F. A.** (1961) Locomotor mechanisms of birds. *Smithson. Misc. Coll.* **143**, 1-91.
- Oakeson, B. B.** (1956) Liver and spleen weight cycles in non-migratory White-crowned Sparrows. *Condor* **58**, 45-50.
- Rensch, I. and Rensch, B.** (1956) Relative Organmaße bei tropischen Warmblütern. *Zool. Anz.* **156**, 106-124.
