# Supplementary material for: Small organ size contributes to the slow pace of life in tropical birds
Source: Oxford University Press journal article supplement (doi:10.1242/jeb.065144), 2012-04-25
Supplement: jeb065144tables2.pdf [file jeb065144tables2.pdf]

Table S2. Climate of breeding area, diet, migratory behaviour (long-distance or not), mean ( $\pm$ s.e.m. where available) body mass (g) and dry mass of organs (mg) of birds collected for this study (sample sizes in parentheses)

|                | <i>Amazilia tzacatl</i> | <i>Archilochus colubris</i> | <i>Arremonops conirostris</i> | <i>Astragalinus tristis</i> | <i>Attila spadiceus</i> | <i>Brotogeris jugularis</i> | <i>Cardinalis cardinalis</i> |
|----------------|-------------------------|-----------------------------|-------------------------------|-----------------------------|-------------------------|-----------------------------|------------------------------|
| Climate        | Tropical                | Temperate                   | Tropical                      | Temperate                   | Tropical                | Tropical                    | Temperate                    |
| Diet           | Nectarivorous           | Nectarivorous               | Omnivorous                    | Granivorous                 | Insectivorous           | Granivorous                 | Granivorous                  |
| Migratory      | No                      | Yes                         | No                            | No                          | No                      | No                          | No                           |
| Body mass (n)  | 6.5 (1)                 | 2.7 (1)                     | 39.9 (5)                      | 11.4 (7)                    | 36.2 (1)                | 57.2 (1)                    | 38.8 (6)                     |
| Brain          | 0.070 (1)               | 0.016 (1)                   | 0.295 $\pm$ 0.004 (5)         | 0.114 $\pm$ 0.004 (7)       | 0.191 (1)               | 0.479 (1)                   | 0.301 $\pm$ 0.007 (6)        |
| Carcass        | 0.865 (1)               | 0.298 (1)                   | 5.731 $\pm$ 0.245 (5)         | 1.708 $\pm$ 0.086 (7)       | 4.931 (1)               | 7.942 (1)                   | 4.920 $\pm$ 0.323 (6)        |
| Fat            | 0.001 (1)               | 0.001 (1)                   | 0.014 $\pm$ 0.007 (5)         | 0.028 $\pm$ 0.010 (7)       | 0.001 (1)               | 0.001 (1)                   | 0.060 $\pm$ 0.032 (6)        |
| Gallbladder    | 0.000 (1)               | (0)                         | 0.005 (1)                     | (0)                         | 0.000 (1)               | 0.000 (1)                   | 0.005 $\pm$ 0.003 (3)        |
| Gizzard        | 0.057 (1)               | 0.003 (1)                   | 0.332 $\pm$ 0.008 (5)         | 0.051 $\pm$ 0.004 (6)       | 0.265 (1)               | 0.130 (1)                   | 0.354 $\pm$ 0.032 (6)        |
| Heart          | 0.017 (1)               | 0.018 (1)                   | 0.093 $\pm$ 0.006 (4)         | 0.051 $\pm$ 0.001 (7)       | 0.097 (1)               | 0.239 (1)                   | 0.121 $\pm$ 0.011 (6)        |
| Intestines     | 0.006 (1)               | 0.013 (1)                   | 0.191 $\pm$ 0.015 (5)         | 0.032 $\pm$ 0.004 (7)       | 0.122 (1)               | 0.168 (1)                   | 0.163 $\pm$ 0.021 (6)        |
| Kidneys        | 0.016 (1)               | 0.007 (1)                   | 0.079 $\pm$ 0.006 (5)         | 0.037 $\pm$ 0.002 (6)       | 0.107 (1)               | 0.085 (1)                   | 0.127 $\pm$ 0.013 (5)        |
| Leg muscles    | 0.086 (.1)              | 0.014 (1)                   | 1.177 $\pm$ 0.054 (5)         | 0.144 $\pm$ 0.008 (7)       | 0.585 (1)               | 0.811 (1)                   | 0.600 $\pm$ 0.033 (6)        |
| Liver          | 0.034 (1)               | 0.037 (1)                   | 0.350 $\pm$ 0.042 (5)         | 0.092 $\pm$ 0.011 (7)       | 0.29 (1)                | 0.381 (1)                   | 0.291 $\pm$ 0.022 (6)        |
| Lungs          | 0.010 (1)               | 0.018 (1)                   | 0.076 $\pm$ 0.007 (5)         | 0.057 $\pm$ 0.003 (6)       | 0.111 (1)               | 0.193 (1)                   | 0.116 $\pm$ 0.007 (5)        |
| Ovaries        | (0)                     | (0)                         | (0)                           | 0.006 $\pm$ 0.002 (3)       | 0.581 (1)               | (0)                         | 0.018 $\pm$ 0.006 (2)        |
| Oviduct        | (0)                     | (0)                         | (0)                           | 0.002 $\pm$ 0 (0)           | (0)                     | (0)                         | 0.018 $\pm$ 0.018 (2)        |
| Flight muscles | 0.358 (1)               | 0.221 (1)                   | 1.450 $\pm$ 0.08 (5)          | 0.682 $\pm$ 0.022 (7)       | 1.524 (1)               | 3.349 (1)                   | 1.891 $\pm$ 0.123 (6)        |
| Skin           | (0)                     | (0)                         | 0.352 $\pm$ 0.027 (5)         | 0.141 $\pm$ 0.017 (6)       | (0)                     | (0)                         | 0.328 $\pm$ 0.038 (5)        |
| Spleen         | 0.001 (1)               | (0)                         | 0.014 $\pm$ 0.005 (4)         | 0.002 $\pm$ 0.001 (7)       | 0.001 (1)               | 0.001 (1)                   | 0.008 $\pm$ 0.001 (6)        |
| Testes         | 0.001 (1)               | 0.000 (1)                   | 0.037 $\pm$ 0.009 (4)         | 0.023 $\pm$ 0.006 (4)       | (0)                     | 0.009 (1)                   | 0.051 $\pm$ 0.006 (4)        |

|                | <i>Columbina talpacoti</i> | <i>Contopus virens</i> | <i>Contorchilus leucotis</i> | <i>Cyanoloxia cyanooides</i> | <i>Dendroica petechia</i> | <i>Euphonia lanirostris</i> | <i>Florisuga mellivora</i> |
|----------------|----------------------------|------------------------|------------------------------|------------------------------|---------------------------|-----------------------------|----------------------------|
| Climate        | Tropical                   | Temperate              | Tropical                     | Tropical                     | Temperate                 | Tropical                    | Tropical                   |
| Diet           | Granivorous                | Insectivorous          | Insectivorous                | Omnivorous                   | Insectivorous             | Frugivorous                 | Nectivorous                |
| Migratory      | No                         | Yes                    | No                           | No                           | Yes                       | No                          | No                         |
| Body mass (n)  | 37.9 (8)                   | 11.6 (1)               | 20.3 (5)                     | 26.8 (5)                     | 7.2 (1)                   | 12.8 (5)                    | 7.0 (1)                    |
| Brain          | 0.119±0.004 (7)            | 0.090 (1)              | 0.192±0.006 (5)              | 0.250±0.011 (5)              | 0.088 (1)                 | 0.133±0.007 (4)             | 0.034 (1)                  |
| Carcass        | 4.577±0.196 (8)            | 1.530 (1)              | 2.801±0.072 (5)              | 4.175±0.239 (5)              | 1.154 (1)                 | 1.859±0.054 (5)             | 0.923 (1)                  |
| Fat            | 0.001±0.000 (8)            | 0.001 (1)              | 0.028±0.014 (5)              | 0.001±0.000 (5)              | 0.001 (1)                 | 0.015±0.007 (5)             | 0.001 (1)                  |
| Gallbladder    | 0.004±0.002 (4)            | (0)                    | 0.002±0.001 (3)              | 0.004 (1)                    | (0)                       | 0.002±0.000 (3)             | 0.000 (1)                  |
| Gizzard        | 0.407±0.013 (8)            | 0.079 (1)              | 0.177±0.009 (5)              | 0.210±0.027 (5)              | 0.045 (1)                 | 0.010±0.000 (5)             | 0.017 (1)                  |
| Heart          | 0.095±0.006 (8)            | 0.039 (1)              | 0.053±0.008 (5)              | 0.067±0.006 (5)              | 0.028 (1)                 | 0.043±0.002 (5)             | 0.049 (1)                  |
| Intestines     | 0.101±0.012 (8)            | 0.011 (1)              | 0.099±0.005 (5)              | 0.082±0.010 (5)              | 0.017 (1)                 | 0.086±0.007 (5)             | 0.026 (1)                  |
| Kidneys        | 0.044±0.002 (8)            | 0.038 (1)              | 0.058±0.006 (5)              | 0.044±0.003 (5)              | 0.028 (1)                 | 0.036±0.002 (5)             | 0.019 (1)                  |
| Leg muscles    | 0.506±0.021 (8)            | 0.101 (1)              | 0.621±0.018 (5)              | 0.448±0.032 (5)              | 0.151 (1)                 | 0.202±0.011 (5)             | 0.027 (1)                  |
| Liver          | 0.210±0.024 (8)            | 0.073 (1)              | 0.188±0.018 (5)              | 0.174±0.035 (5)              | 0.057 (1)                 | 0.171±0.019 (5)             | 0.048 (1)                  |
| Lungs          | 0.077±0.005 (8)            | 0.036 (1)              | 0.042±0.004 (5)              | 0.059±0.009 (5)              | 0.034 (1)                 | 0.032±0.003 (5)             | 0.017 (1)                  |
| Ovaries        | 0.005±0.002 (5)            | (0)                    | 0.014 (1)                    | 0.006±0.003 (3)              | (0)                       | 0.205±0.010 (2)             | 0.005 (1)                  |
| Oviduct        | 0.000±0.000 (3)            | (0)                    | 0.000 (1)                    | 0.000±0.000 (3)              | (0)                       | 0.000±0.000 (2)             | (0)                        |
| Flight muscles | 2.605±0.146 (8)            | 0.643 (1)              | 0.580±0.044 (5)              | 1.282±0.087 (5)              | 0.346 (1)                 | 0.636±0.030 (5)             | 0.470 (1)                  |
| Skin           | 0.497±0.074 (5)            | 0.092 (1)              | 0.237±0.013 (4)              | 0.187±0.016 (5)              | (0)                       | 0.145±0.013 (5)             | (0)                        |
| Spleen         | 0.001±0.000 (4)            | (0)                    | 0.003±0.001 (5)              | 0.013±0.005 (5)              | 0.001 (1)                 | 0.004±0.001 (4)             | 0.001 (1)                  |
| Testes         | 0.013±0.003 (2)            | 0.008 (1)              | 0.007±0.002 (4)              | 0.019±0.013 (2)              | 0.020 (1)                 | 0.024±0.006 (3)             | (0)                        |

|                | <i>Gymnophthys leucaspis</i> | <i>Hylophylax naevioides</i> | <i>Lepidothrix coronata</i> | <i>Leptotila verreauxi</i> | <i>Manacus vitellinus</i> | <i>Melanerpes rubricapillus</i> | <i>Melospiza melodia</i> |
|----------------|------------------------------|------------------------------|-----------------------------|----------------------------|---------------------------|---------------------------------|--------------------------|
| Climate        | Tropical                     | Tropical                     | Tropical                    | Tropical                   | Tropical                  | Tropical                        | Temperate                |
| Diet           | Insectivorous                | Insectivorous                | Frugivorous                 | Granivorous                | Frugivorous               | Insectivorous                   | Omnivorous               |
| Migratory      | No                           | No                           | No                          | No                         | No                        | No                              | No                       |
| Body mass (n)  | 30.2 (1)                     | 16.1 (2)                     | 8.6 (2)                     | 132.1 (1)                  | 15.0 (2)                  | 43.5 (1)                        | 19.3 (5)                 |
| Brain          | 0.160 (1)                    | 0.124±0.020 (2)              | 0.079±0.013 (2)             | 0.247 (1)                  | 0.111±0.002 (2)           | 0.300 (1)                       | 0.187±0.009 (5)          |
| Carcass        | 4.386 (1)                    | 2.037±0.046 (2)              | 1.149±0.041 (2)             | 19.964 (1)                 | 1.993±0.118 (2)           | 6.314 (1)                       | 2.619±0.145 (5)          |
| Fat            | 0.001 (1)                    | 0.001±0.000 (2)              | 0.001±0.000 (2)             | 5.193 (1)                  | 0.122±0.121 (2)           | 0.001 (1)                       | 0.042±0.018 (5)          |
| Gallbladder    | 0.000 (1)                    | 0.000±0.000 (2)              | 0.000±0.000 (2)             | 0.000 (1)                  | 0.001±0.001 (2)           | 0.002 (1)                       | (0)                      |
| Gizzard        | 0.200 (1)                    | 0.151±0.001 (2)              | 0.102±0.018 (2)             | 2.042 (1)                  | 0.200±0.029 (2)           | 0.324 (1)                       | 0.145±0.023 (5)          |
| Heart          | 0.102 (1)                    | 0.044±0.000 (2)              | 0.028±0.004 (2)             | 0.477 (1)                  | 0.046±0.001 (2)           | 0.110 (1)                       | 0.055±0.003 (5)          |
| Intestines     | 0.064 (1)                    | 0.055±0.009 (2)              | 0.023±0.000 (2)             | 0.354 (1)                  | 0.068±0.011 (2)           | 0.119 (1)                       | 0.084±0.031 (5)          |
| Kidneys        | 0.114 (1)                    | 0.049±0.003 (2)              | 0.033±0.000 (2)             | 0.149 (1)                  | 0.048±0.002 (2)           | 0.091 (1)                       | 0.063±0.008 (5)          |
| Leg muscles    | 1.059 (1)                    | 0.375±0.026 (2)              | 0.102±0.010 (2)             | 2.003 (1)                  | 0.212±0.028 (2)           | 0.598 (1)                       | 0.454±0.029 (5)          |
| Liver          | 0.298 (1)                    | 0.167±0.007 (2)              | 0.064±0.012 (2)             | 0.960 (1)                  | 0.138±0.012 (2)           | 0.330 (1)                       | 0.165±0.015 (5)          |
| Lungs          | 0.108 (1)                    | 0.033±0.000 (2)              | 0.023±0.001 (2)             | 0.320 (1)                  | 0.040±0.008 (2)           | 0.108 (1)                       | 0.059±0.005 (5)          |
| Ovaries        | (0)                          | 0.003 (1)                    | 0.003 (1)                   | (0)                        | 0.003±0.001 (2)           | 0.012 (1)                       | 0.059±0.059 (5)          |
| Oviduct        | (0)                          | (0)                          | (0)                         | (0)                        | (0)                       | (0)                             | 0.066±0.066 (5)          |
| Flight muscles | 0.961 (1)                    | 0.436±0.045 (2)              | 0.386±0.011 (2)             | 11.395 (1)                 | 0.681±0.113 (2)           | 1.654 (1)                       | 0.728±0.091 (5)          |
| Skin           | (0)                          | (0)                          | (0)                         | (0)                        | (0)                       | (0)                             | (0)                      |
| Spleen         | 0.001 (1)                    | 0.001±0.000 (2)              | 0.001±0.000 (2)             | 0.001 (1)                  | 0.001±0.000 (2)           | 0.001 (1)                       | 0.003±0.001 (4)          |
| Testes         | 0.004 (1)                    | 0 (1)                        | 0.002 (1)                   | (0)                        | (0)                       | (0)                             | 0.037±0.003 (3)          |

|                | <i>Mimus gilvus</i> | <i>Mimus polyglottos</i> | <i>Molothrus ater</i> | <i>Myiozetetes similis</i> | <i>Nyctidromus albicollis</i> | <i>Pipra mentalis</i> | <i>Pipromorpha oliaginea</i> |
|----------------|---------------------|--------------------------|-----------------------|----------------------------|-------------------------------|-----------------------|------------------------------|
| Climate        | Tropical            | Temperate                | Temperate             | Tropical                   | Tropical                      | Tropical              | Tropical                     |
| Diet           | Omnivorous          | Omnivorous               | Omnivorous            | Insectivorous              | Insectivorous                 | Frugivorous           | Omnivorous                   |
| Migratory      | No                  | No                       | No                    | No                         | No                            | No                    | No                           |
| Body mass (n)  | 59.8 (5)            | 46.6 (5)                 | 39.0 (2)              | 22.8 (2)                   | 49.5 (3)                      | 12.2 (3)              | 9.5 (6)                      |
| Brain          | 0.338±0.012 (5)     | 0.269±0.011 (5)          | 0.251±0.001 (2)       | 0.127±0.004 (2)            | 0.146±0.014 (3)               | 0.091±0.004 (3)       | 0.089±0.006 (6)              |
| Carcass        | 8.781±0.271 (5)     | 6.636±0.382 (5)          | 4.644±0.202 (2)       | 3.144±0.084 (2)            | 7.755±0.794 (3)               | 1.576±0.053 (3)       | 1.278±0.029 (6)              |
| Fat            | 0.038±0.020 (5)     | 0.082±0.061 (5)          | 0.079±0.040 (2)       | 0.001±0.000 (2)            | 0.162±0.161 (3)               | 0.001±0.000 (3)       | 0.010±0.009 (6)              |
| Gallbladder    | (0)                 | 0.008±0.001 (5)          | 0.003 (1)             | 0.001±0.001 (2)            | 0.001±0.001 (3)               | 0.003±0.001 (3)       | 0.001 (1)                    |
| Gizzard        | 0.397±0.022 (5)     | 0.365±0.022 (5)          | 0.256±0.013 (2)       | 0.193±0.025 (2)            | 0.727±0.028 (3)               | 0.134±0.034 (3)       | 0.083±0.008 (6)              |
| Heart          | 0.128±0.005 (5)     | 0.166±0.008 (5)          | 0.114±0.011 (2)       | 0.073±0.013 (2)            | 0.114±0.013 (3)               | 0.036±0.003 (3)       | 0.033±0.001 (6)              |
| Intestines     | 0.368±0.044 (5)     | 0.235±0.039 (5)          | 0.222±0.111 (2)       | 0.083±0.046 (2)            | 0.100±0.016 (3)               | 0.035±0.009 (3)       | 0.035±0.007 (6)              |
| Kidneys        | 0.151±0.008 (5)     | 0.162±0.014 (5)          | 0.111±0.003 (2)       | 0.051±0.009 (2)            | 0.080±0.004 (3)               | 0.042±0.002 (3)       | 0.027±0.002 (6)              |
| Leg muscles    | 1.624±0.051 (5)     | 1.051±0.055 (5)          | 0.638±0.066 (2)       | 0.263±0.050 (2)            | 0.635±0.076 (3)               | 0.171±0.012 (3)       | 0.122±0.007 (6)              |
| Liver          | 0.462±0.026 (5)     | 0.450±0.033 (5)          | 0.329±0.008 (2)       | 0.155±0.037 (2)            | 0.246±0.045 (3)               | 0.081±0.006 (3)       | 0.067±0.008 (6)              |
| Lungs          | 0.150±0.023 (5)     | 0.182±0.016 (5)          | 0.162±0.011 (2)       | 0.059±0.001 (2)            | 0.103±0.013 (3)               | 0.040±0.002 (3)       | 0.024±0.002 (6)              |
| Ovaries        | 0.020±0.008 (2)     | 0.027 (1)                | 0.088±0.066 (2)       | 0.008 (1)                  | 0.007±0.002 (2)               | (0)                   | 0.000 (1)                    |
| Oviduct        | 0.000±0.000 (2)     | 0.085 (1)                | 0.545±0.123 (2)       | (0)                        | (0)                           | (0)                   | 0.035 (1)                    |
| Flight muscles | 2.289±0.110 (5)     | 2.142±0.141 (5)          | 2.062±0.157 (2)       | 1.197±0.026 (2)            | 2.306±0.121 (3)               | 0.643±0.060 (3)       | 0.556±0.042 (6)              |
| Skin           | 0.644±0.027 (5)     | 0.464±0.013 (2)          | (0)                   | (0)                        | (0)                           | (0)                   | 0.098±0.006 (5)              |
| Spleen         | 0.005±0.000 (5)     | 0.008±0.002 (5)          | 0.01±0.004 (2)        | 0.001±0.000 (2)            | 0.001±0.000 (3)               | 0.001±0.000 (3)       | 0.003±0.002 (6)              |
| Testes         | 0.013±0.010 (3)     | 0.034±0.003 (4)          | (0)                   | 0.003 (1)                  | 0.009 (1)                     | 0.002±0.000 (3)       | 0.005±0.001 (5)              |

|                | <i>Piranga olivacea</i> | <i>Progne chalybea</i> | <i>Quiscalus quiscula</i> | <i>Sayornis phoebe</i> | <i>Spizella passerina</i> | <i>Sporophila corvina</i> | <i>Tachycineta albilinea</i> |
|----------------|-------------------------|------------------------|---------------------------|------------------------|---------------------------|---------------------------|------------------------------|
| Climate        | Temperate               | Tropical               | Temperate                 | Temperate              | Temperate                 | Tropical                  | Tropical                     |
| Diet           | Insectivorous           | Insectivorous          | Omnivorous                | Insectivorous          | Granivorous               | Granivorous               | Insectivorous                |
| Migratory      | Yes                     | No                     | No                        | Yes                    | No                        | No                        | No                           |
| Body mass (n)  | 27.3 (4)                | 35.7 (5)               | 108.2 (1)                 | 16.6 (5)               | 11.0 (5)                  | 10.1 (1)0                 | 13.4 (5)                     |
| Brain          | 0.196±0.005 (4)         | 0.206±0.005 (5)        | 0.596 (1)                 | 0.121±0.005 (4)        | 0.102±0.004 (5)           | 0.121±0.003 (1)0          | 0.102±0.006 (5)              |
| Carcass        | 3.891±0.373 (4)         | 5.393±0.301 (5)        | 16.205 (1)                | 2.127±0.059 (4)        | 1.357±0.066 (5)           | 1.535±0.042 (1)0          | 1.811±0.064 (5)              |
| Fat            | 0.011±0.008 (4)         | 0.182±0.167 (5)        | 0.078 (1)                 | 0.010±0.009 (4)        | 0.003±0.002 (5)           | 0.003±0.002 (1)0          | 0.010±0.009 (5)              |
| Gallbladder    | (0)                     | (0)                    | 0.008 (1)                 | 0.003 (1)              | (0)                       | 0.000±0.000 (5)           | 0.000 (1)                    |
| Gizzard        | 0.158±0.005 (4)         | 0.343±0.033 (5)        | 0.763 (1)                 | 0.134±0.008 (4)        | 0.097±0.004 (5)           | 0.070±0.004 (1)0          | 0.124±0.006 (5)              |
| Heart          | 0.088±0.004 (4)         | 0.155±0.009 (4)        | 0.325 (1)                 | 0.050±0.005 (4)        | 0.036±0.002 (5)           | 0.034±0.002 (1)0          | 0.046±0.002 (5)              |
| Intestines     | 0.094±0.010 (4)         | 0.184±0.034 (5)        | 0.574 (1)                 | 0.035±0.005 (4)        | 0.031±0.003 (5)           | 0.035±0.005 (1)0          | 0.106±0.018 (5)              |
| Kidneys        | 0.095±0.006 (4)         | 0.103±0.010 (5)        | 0.297 (1)                 | 0.065±0.002 (4)        | 0.033±0.003 (5)           | 0.017±0.001 (1)0          | 0.046±0.003 (5)              |
| Leg muscles    | 0.353±0.014 (4)         | 0.407±0.035 (5)        | 2.553 (1)                 | 0.170±0.013 (4)        | 0.146±0.007 (5)           | 0.165±0.008 (1)0          | 0.108±0.012 (5)              |
| Liver          | 0.220±0.015 (4)         | 0.246±0.030 (5)        | 0.928 (1)                 | 0.149±0.018 (4)        | 0.089±0.006 (5)           | 0.095±0.009 (1)0          | 0.132±0.009 (5)              |
| Lungs          | 0.104±0.008 (4)         | 0.123±0.012 (5)        | 0.610 (1)                 | 0.057±0.005 (4)        | 0.037±0.004 (5)           | 0.029±0.002 (1)0          | 0.041±0.002 (5)              |
| Ovaries        | (0)                     | 0.005±0.005 (2)        | (0)                       | 0.005±0.002 (3)        | 0.005 (1)                 | 0.001±0.001 (5)           | 0.002 (1)                    |
| Oviduct        | (0)                     | 0.000±0.000 (2)        | (0)                       | 0.006±0.002 (3)        | 0 (1)                     | 0.000±0.000 (3)           | 0.000 (1)                    |
| Flight muscles | 1.614±0.084 (4)         | 1.833±0.164 (5)        | 5.396 (1)                 | 0.870±0.063 (4)        | 0.613±0.077 (5)           | 0.420±0.017 (1)0          | 0.607±0.057 (5)              |
| Skin           | 0.224±0.025 (4)         | 0.600±0.126 (5)        | (0)                       | 0.163±0.017 (4)        | 0.073±0.005 (4)           | 0.112±0.010 (5)           | 0.183±0.008 (4)              |
| Spleen         | 0.006±0.001 (4)         | 0.004±0.001 (5)        | 0.015 (1)                 | 0.002±0.000 (3)        | 0.003±0.001 (5)           | 0.002±0.001 (8)           | 0.003±0.001 (5)              |
| Testes         | 0.103±0.013 (4)         | 0.117±0.024 (3)        | 0.245 (1)                 | 0.017 (1)              | 0.030±0.006 (4)           | 0.002±0.001 (5)           | 0.001±0.001 (4)              |

|                | <i>Tachycineta bicolor</i> | <i>Tangara episcopus</i> | <i>Tangara larvata</i> | <i>Tangara palmarum</i> | <i>Thamnophilus doliatus</i> | <i>Troglodytes aedon</i> | <i>Troglodytes musculus</i> |
|----------------|----------------------------|--------------------------|------------------------|-------------------------|------------------------------|--------------------------|-----------------------------|
| Climate        | Temperate                  | Tropical                 | Tropical               | Tropical                | Tropical                     | Temperate                | Tropical                    |
| Diet           | Insectivorous              | Frugivorous              | Frugivorous            | Frugivorous             | Insectivorous                | Insectivorous            | Insectivorous               |
| Migratory      | Yes                        | No                       | No                     | No                      | No                           | No                       | No                          |
| Body mass (n)  | 16.3 (5)                   | 31.2 (8)                 | 32.3 (1)               | 34.5 (1)                | 29.9 (1)                     | 9.4 (6)                  | 12.8 (9)                    |
| Brain          | 0.106±0.004 (5)            | 0.213±0.007 (8)          | 0.176 (1)              | 0.235 (1)               | 0.201 (1)                    | 0.112±0.002 (5)          | 0.127±0.003 (9)             |
| Carcass        | 2.017±0.104 (5)            | 4.701±0.136 (8)          | 4.715 (1)              | 4.648 (1)               | 4.138 (1)                    | 1.176±0.043 (5)          | 1.780±0.061 (9)             |
| Fat            | 0.051±0.033 (5)            | 0.047±0.037 (8)          | 0.001 (1)              | 0.001 (1)               | 0.001 (1)                    | 0.011±0.005 (5)          | 0.014±0.010 (9)             |
| Gallbladder    | 0.004 (1)                  | 0.005±0.001 (4)          | 0.000 (1)              | 0.004 (1)               | 0.000 (1)                    | (0)                      | 0.000±0.000 (4)             |
| Gizzard        | 0.156±0.010 (5)            | 0.087±0.009 (8)          | 0.243 (1)              | 0.119 (1)               | 0.384 (1)                    | 0.082±0.006 (5)          | 0.095±0.003 (8)             |
| Heart          | 0.052±0.002 (5)            | 0.110±0.005 (8)          | 0.121 (1)              | 0.108 (1)               | 0.090 (1)                    | 0.033±0.001 (5)          | 0.041±0.002 (9)             |
| Intestines     | 0.090±0.018 (5)            | 0.178±0.015 (8)          | 0.091 (1)              | 0.183 (1)               | 0.140 (1)                    | 0.030±0.007 (5)          | 0.054±0.008 (9)             |
| Kidneys        | 0.066±0.002 (5)            | 0.070±0.006 (8)          | 0.101 (1)              | 0.070 (1)               | 0.100 (1)                    | 0.038±0.004 (5)          | 0.036±0.003 (9)             |
| Leg muscles    | 0.150±0.012 (5)            | 0.576±0.028 (8)          | 0.485 (1)              | 0.590 (1)               | 0.683 (1)                    | 0.232±0.012 (5)          | 0.369±0.014 (9)             |
| Liver          | 0.148±0.013 (5)            | 0.321±0.022 (8)          | 0.307 (1)              | 0.303 (1)               | 0.408 (1)                    | 0.093±0.010 (5)          | 0.109±0.009 (9)             |
| Lungs          | 0.077±0.004 (5)            | 0.088±0.006 (8)          | 0.079 (1)              | 0.122 (1)               | 0.065 (1)                    | 0.033±0.003 (5)          | 0.033±0.003 (9)             |
| Ovaries        | 0.006±0.001 (3)            | 0.018±0.007 (4)          | (0)                    | (0)                     | (0)                          | 0.013±0.003 (2)          | 0.005 (1)                   |
| Oviduct        | 0.009±0.000 (3)            | 0.020±0.020 (2)          | (0)                    | (0)                     | (0)                          | 0.088±0.057 (2)          | 0.000 (1)                   |
| Flight muscles | 0.709±0.060 (5)            | 1.682±0.089 (8)          | 1.308 (1)              | 1.853 (1)               | 0.730 (1)                    | 0.302±0.015 (5)          | 0.411±0.026 (9)             |
| Skin           | 0.247±0.045 (5)            | 0.321±0.024 (5)          | (0)                    | (0)                     | (0)                          | 0.104±0.007 (4)          | 0.163±0.010 (5)             |
| Spleen         | 0.002±0.001 (5)            | 0.004±0.001 (8)          | 0.001 (1)              | 0.001 (1)               | 0.001 (1)                    | 0.001±0.000 (5)          | 0.003±0.002 (7)             |
| Testes         | 0.056±0.027 (2)            | 0.049±0.016 (4)          | 0.003 (1)              | 0.012 (1)               | 0.004 (1)                    | 0.031±0.001 (3)          | 0.006±0.002 (8)             |

|                | <i>Turdus grayi</i> | <i>Turdus migratorius</i> | <i>Vireo flavoviridis</i> | <i>Vireo olivaceus</i> | <i>Xenops minutus</i> | <i>Xiphorhynchus guttatus</i> | <i>Zenaida macroura</i> |
|----------------|---------------------|---------------------------|---------------------------|------------------------|-----------------------|-------------------------------|-------------------------|
| Climate        | Tropical            | Temperate                 | Tropical                  | Temperate              | Tropical              | Tropical                      | Temperate               |
| Diet           | Omnivorous          | Omnivorous                | Insectivorous             | Insectivorous          | Insectivorous         | Insectivorous                 | Granivorous             |
| Migratory      | No                  | No                        | No                        | Yes                    | No                    | No                            | No                      |
| Body mass (n)  | 65.9 (11)           | 73.7 (5)                  | 17.1 (5)                  | 15.1 (7)               | 11.0 (1)              | 43.6 (1)                      | 122.8 (6)               |
| Brain          | 0.328±0.016 (11)    | 0.332±0.012 (4)           | 0.136±0.008 (5)           | 0.125±0.005 (6)        | 0.084 (1)             | 0.316 (1)                     | 0.226±0.008 (6)         |
| Carcass        | 9.546±0.510 (11)    | 9.383±0.624 (4)           | 2.443±0.17 (5)            | 2.134±0.139 (7)        | 1.536 (1)             | 7.299 (1)                     | 14.154±0.781 (6)        |
| Fat            | 0.042±0.016 (11)    | 0.026±0.017 (4)           | 0.342±0.336 (5)           | 0.016±0.009 (7)        | 0.001 (1)             | 0.001 (1)                     | 0.359 (0).1 (6)         |
| Gallbladder    | 0.006±0.001 (7)     | 0.010±0.003 (2)           | 0.009 (1)                 | (0)                    | 0.000 (1)             | 0.002 (1)                     | (0)                     |
| Gizzard        | 0.345±0.052 (10)    | 0.300±0.053 (4)           | 0.107±0.004 (4)           | 0.079±0.005 (7)        | 0.077 (1)             | 0.319 (1)                     | 0.863±0.019 (6)         |
| Heart          | 0.169±0.009 (11)    | 0.245±0.018 (4)           | 0.060±0.004 (4)           | 0.072±0.005 (7)        | 0.049 (1)             | 0.108 (1)                     | 0.427±0.010 (6)         |
| Intestines     | 0.421±0.049 (11)    | 0.374±0.041 (4)           | 0.080±0.004 (4)           | 0.038±0.005 (7)        | 0.011 (1)             | 0.049 (1)                     | 0.280±0.043 (6)         |
| Kidneys        | 0.135±0.007 (11)    | 0.230±0.024 (4)           | 0.055±0.006 (5)           | 0.061±0.005 (7)        | 0.020 (1)             | 0.126 (1)                     | 0.211±0.008 (6)         |
| Leg muscles    | 1.144±0.082 (11)    | 1.242±0.053 (4)           | 0.271±0.015 (5)           | 0.205±0.008 (7)        | 0.205 (1)             | 0.787 (1)                     | 1.434±0.069 (6)         |
| Liver          | 0.488±0.036 (10)    | 0.661±0.025 (4)           | 0.148±0.012 (5)           | 0.119±0.007 (7)        | 0.065 (1)             | 0.264 (1)                     | 0.778±0.033 (6)         |
| Lungs          | 0.183±0.013 (11)    | 0.251±0.012 (4)           | 0.052±0.008 (5)           | 0.071±0.006 (7)        | 0.025 (1)             | 0.073 (1)                     | 0.448±0.020 (6)         |
| Ovaries        | 0.030±0.013 (7)     | 0.025 (1)                 | 0.018±0.018 (2)           | 0.009 (1)              | (0)                   | (0)                           | 0.026±0.026 (2)         |
| Oviduct        | 0.000±0.000 (2)     | 0.031 (1)                 | 0.092±0.092 (2)           | 0.018 (1)              | (0)                   | (0)                           | 0.139±0.139 (2)         |
| Flight muscles | 3.474±0.268 (11)    | 4.392±0.136 (4)           | 0.740±0.078 (5)           | 0.819±0.061 (7)        | 0.512 (1)             | 2.244 (1)                     | 10.897±0.258 (6)        |
| Skin           | 0.555±0.059 (5)     | (0)                       | 0.168±0.007 (4)           | 0.137±0.021 (6)        | (0)                   | (0)                           | 2.019 (1)               |
| Spleen         | 0.005±0.002 (10)    | 0.031±0.011 (4)           | 0.003±0.001 (5)           | 0.004±0.001 (7)        | 0.001 (1)             | 0.001 (1)                     | 0.025±0.005 (6)         |
| Testes         | 0.215±0.082 (4)     | 0.102±0.037 (3)           | 0.030±0.015 (3)           | 0.032±0.004 (6)        | 0.009 (1)             | 0.003 (1)                     | 0.107±0.008 (4)         |
