# Supplementary material for: Small organ size contributes to the slow pace of life in tropical birds
Source: Oxford University Press journal article supplement (doi:10.1242/jeb.065144), 2012-04-25
Supplement: jeb065144tables3.pdf [file jeb065144tables3.pdf]

Table S3. Species pairs used in temperate–tropical pair-wise comparison of tissue masses

| Temperate species                                     | Tropical species                                    |
|-------------------------------------------------------|-----------------------------------------------------|
| Mourning dove <i>Zenaida macroura</i>                 | White-tipped dove <i>Leptotila verreauxi</i>        |
| Ruby-throated hummingbird <i>Archilochus colubris</i> | Rufous-tailed hummingbird <i>Amazilia tzacatl</i>   |
| Eastern phoebe <i>Sayornis phoebe</i>                 | Social flycatcher <i>Myiozetetes similis</i>        |
| Red-eyed vireo <i>Vireo olivaceus</i>                 | Yellow-green vireo <i>Vireo flavoviridis</i>        |
| Tree swallow <i>Tachycineta bicolor</i>               | Mangrove swallow <i>Tachycineta albilinea</i>       |
| Northern house wren <i>Troglodytes aedon</i>          | Southern house wren <i>Troglodytes musculus</i>     |
| Northern mockingbird <i>Mimus polyglottos</i>         | Tropical mockingbird <i>Mimus gilvus</i>            |
| American robin <i>Turdus migratorius</i>              | Clay-colored thrush <i>Turdus grayi</i>             |
| American goldfinch <i>Astragalinus tristis</i>        | Thick-billed euphonia <i>Euphonia laniirostris</i>  |
| Song sparrow <i>Melospiza melodia</i>                 | Black-striped sparrow <i>Arremonops conirostris</i> |
