# Supplementary material for: Small organ size contributes to the slow pace of life in tropical birds
Source: Oxford University Press journal article supplement (doi:10.1242/jeb.065144), 2012-04-25
Supplement: jeb065144tables4.pdf [file jeb065144tables4.pdf]

Table S4. Results of phylogenetic generalized least squares models describing dry organ mass as a function of body mass, tropical or temperate climate, sex, migratory strategy (long-distance migrants that breed in North America and migrate at least as far as Central America vs sedentary birds and short-distance migrants) and diet

|                                      | Heart             | Lungs            | Flight muscles   | Leg muscles      | Gizzard          | Intestines      | Liver            |
|--------------------------------------|-------------------|------------------|------------------|------------------|------------------|-----------------|------------------|
| Intercept                            | -2.284±0.077***   | -2.382±0.084***  | -1.308±0.087***  | -2.133±0.108***  | -2.420±0.169***  | -2.587±0.160*** | -1.903±0.099***  |
| log <sub>10</sub> (dry carcass mass) | 0.897±0.034***    | 0.984±0.041***   | 1.050±0.037***   | 1.159±0.0414***  | 0.977±0.075***   | 1.109±0.074***  | 0.927±0.044***   |
| Climate(=tropical)                   | -0.0937±0.0167*** | -0.192±0.026***  | -0.0477±0.0237*  | 0.0432±0.0157**  | -0.0046±0.0471   | 0.0748±0.0394   | -0.0427±0.0223   |
| Sex(=male)                           | 0.0281±0.0116*    | 0.0268±0.0139    | 0.0088±0.0100    | -0.0225±0.0109*  | -0.0351±0.0212   | -0.110±0.028*** | -0.0355±0.0156*  |
| Migrant(=yes)                        | -0.0525±0.0287    | 0.0391±0.0404    | 0.0674±0.0364    | 0.0007±0.0281    | -0.203±0.073**   | -0.0179±0.0670  | -0.0135±0.0379   |
| Diet(=granivorous)                   | -0.0281±0.0297    | 0.0447±0.0405    | 0.0204±0.0395    | -0.00465±0.0372  | 0.356±0.078***   | -0.167±0.066*   | -0.144±0.039***  |
| Diet(=insectivorous)                 | -0.0283±0.0352    | -0.0283±0.0448   | -0.106±0.046*    | 0.0101±0.047     | 0.391±0.090***   | -0.160±0.073*   | -0.101±0.045*    |
| Diet(=nectivorous)                   | 0.140±0.106       | -0.0290±0.0913   | 0.0530±0.0811    | -0.169±0.174     | -0.231±0.164     | -0.0208±0.2081  | -0.0536±0.1345   |
| Diet(=omnivorous)                    | -0.0742±0.0302*   | -0.0294.0428     | -0.0221±0.0429   | 0.0864±0.0406*   | 0.286±0.084***   | -0.107±0.065    | -0.129±0.039**   |
| Diet(=frugivorous)                   | 0                 | 0                | 0                | 0                | 0                | 0               | 0                |
| df (residual, total)                 | 175, 184          | 176, 185         | 178, 187         | 178, 187         | 174, 183         | 177, 186        | 177, 186         |
| AIC <sub>C</sub> Pagel               | -339.6 (λ=0.654)  | -268.3 (λ=0.527) | -354.9 (λ=0.819) | -335.7 (λ=0.926) | -80.0 (λ=0.828)  | -34.1 (λ=0.462) | -239.0 (λ=0.601) |
| AIC <sub>C</sub> Grafen              | -348.9 (p=0.186)  | -275.6 (p=0.180) | -366.5 (p=0.392) | -327.2 (p=0.371) | -105.1 (p=0.339) | -29.4 (p=0.097) | -236.2 (p=0.137) |
| AIC <sub>C</sub> Martins             | -325.7 (α=0.393)  | -250.6 (α=0.926) | -328.6 (α=0.160) | -327.0 (α=0.070) | -42.6 (α=0.180)  | -8.1 (α=0.588)  | -221.0 (α=0.495) |

|                                      | Kidneys          | Ovaries         | Testes          | Skin             | Spleen          | Brain            | Feathers         |
|--------------------------------------|------------------|-----------------|-----------------|------------------|-----------------|------------------|------------------|
| Intercept                            | -2.365±0.080***  | -2.602±0.552*** | -2.963±0.479*** | -1.990±0.094***  | -3.541±0.346*** | -1.769±0.074***  | -1.387±0.089***  |
| log <sub>10</sub> (dry carcass mass) | 0.943±0.036***   | 0.979±0.335**   | 1.138±0.245***  | 1.037±0.060***   | 0.936±0.165***  | 0.628±0.030***   | 1.0693±0.0405*** |
| Climate(=tropical)                   | -0.196±0.018***  | -0.310±0.140*   | -0.542±0.159**  | 0.0296±0.0279    | -0.0543±0.0977  | 0.0127±0.0127    | -0.150±0.019***  |
| Sex(=male)                           | -0.0258±0.0125*  |                 |                 | -0.0614±0.0186** | -0.101±0.722    | 0.0134±0.0088    | -0.0184±0.0128*  |
| Migrant(=yes)                        | -0.0765±0.0303*  | -0.325±0.286    | 0.186±0.252     | -0.0154±0.0453   | -0.061±0.157    | -0.0386±0.0222   | 0.0693±0.0128    |
| Diet(=granivorous)                   | -0.154±0.032***  | -0.828±0.311*   | -0.275±0.242    | 0.0229±0.0580    | -0.090±0.181    | 0.0305±0.0269    | 0.0794±0.0345*   |
| Diet(=insectivorous)                 | -0.0147±0.0366   | -0.451±0.332    | -0.167±0.258    | 0.0294±0.0662    | -0.158±0.189    | 0.0151±0.0333    | 0.0107±0.0439    |
| Diet(=nectivorous)                   | 0.0459±0.1090    | -0.208±0.682    | -0.710±0.558    |                  |                 | -0.0531±0.1114   |                  |
| Diet(=omnivorous)                    | -0.124±0.032***  | -0.402±0.352    | -0.001±0.248    | -0.079±0.061     | -0.068±0.167    | 0.0703±0.0284*   | 0.0490±0.0357    |
| Diet(=frugivorous)                   | 0                | 0               | 0               | 0                | 0               | 0                | 0                |
| df (residual, total)                 | 176, 185         | 50, 58          | 105, 113        | 101, 109         | 112, 120        | 175, 184         | 112, 120         |
| AIC <sub>C</sub> Pagel               | -316.6 (λ=0.613) | 106.5 (λ=0.812) | 207.0 (λ=0.171) | -123.0 (λ=0.843) | 151.8 (λ=0.304) | -424.3 (λ=0.848) | -228.8 (λ=0.745) |
| AIC <sub>C</sub> Grafen              | -314.0 (p=0.186) | 105.6 (p=0.162) | 202.5 (p=0.152) | -119.8 (p=0.228) | 152.2 (p=0.049) | -410.8 (p=0.295) | -226.8 (p=0.213) |
| AIC <sub>C</sub> Martins             | -282.2 (α=0.860) | 101.1 (α=0.160) | 210.6 (α=19.5)  | -124.9 (α=0.233) | 153.3 (α=0.978) | -387.7 (α=0.052) | -205.8 (α=0.371) |

Data are log<sub>10</sub> tissue or organ mass.

Parameter estimates for alternative variable values are used as reference and equal 0 and are not shown. For diet, frugivory is used as reference category.

Shown are parameter estimates with standard errors and p-value categories, as well as degrees of freedom (total=number of specimens), evolutionary model parameter estimates and AIC<sub>C</sub> values of final model. Significant variables are emphasized with grey as is the model with lowest AIC<sub>C</sub>. When a model did not converge AIC<sub>C</sub>=NA.

\*P<0.05; \*\*P<0.01; \*\*\* P<0.001.
