# Supplementary figures and images for: Small organ size contributes to the slow pace of life in tropical birds
Source: Oxford University Press journal article supplement (doi:10.1242/jeb.065144), 2012-04-25

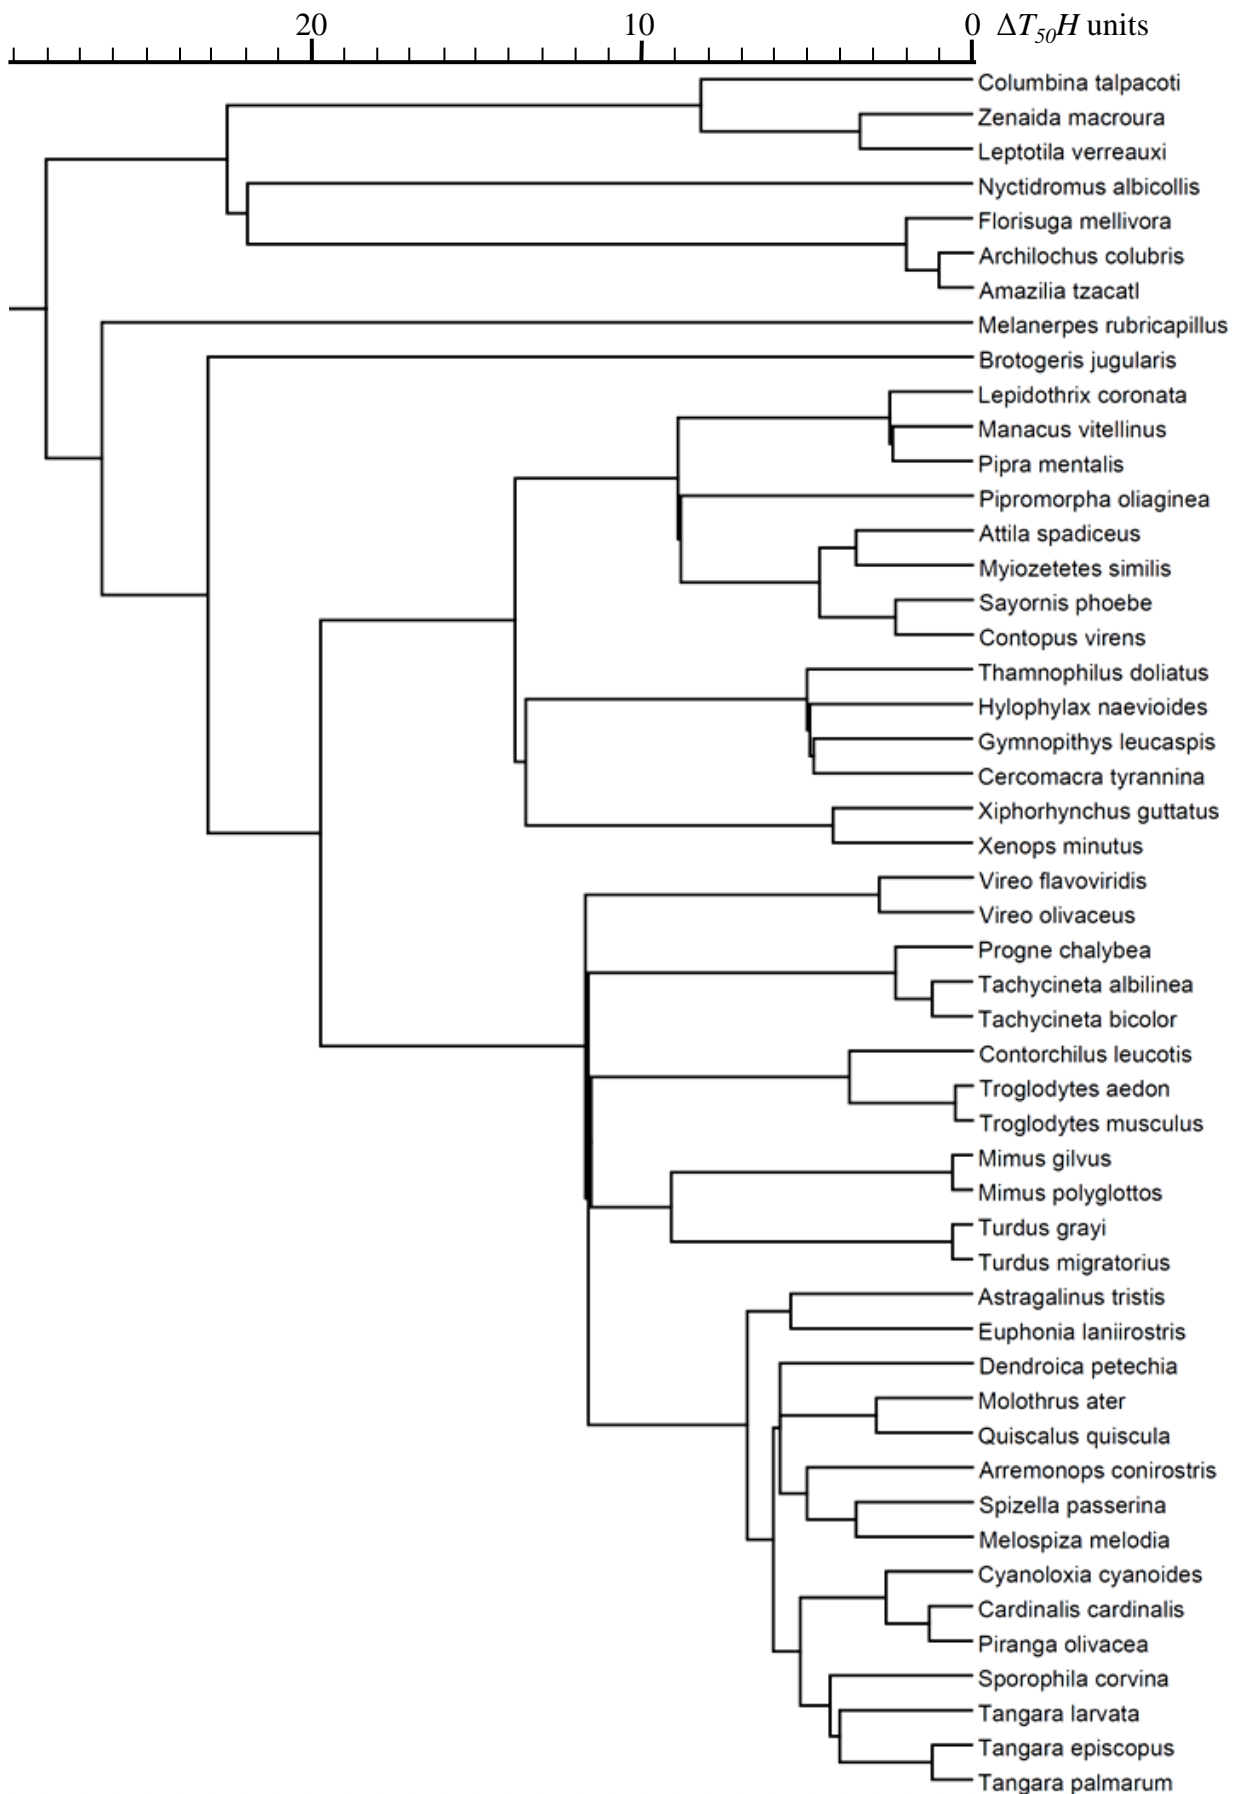

Supplement: jeb065144figs1.pdf [file jeb065144figs1.pdf]
